# Supplementary material for: Polynomial Universal Traversing Sequences for Cycles Are Constructible (Extended Abstract)
Source: Springer Nature journal article supplement (doi:10.1038/s41467-023-36084-0), 1988-01-01
Supplement: MOESM1 [file 41467_2023_36084_MOESM1_ESM.pdf]

## Supplementary Information for

### **Rapid metabolic reprogramming mediated by the AMP-activated protein kinase during the lytic cycle of *Toxoplasma gondii***

Yaqiong Li <sup>1</sup>, Zhipeng Niu <sup>1#</sup>, Jichao Yang <sup>1#</sup>, Xuke Yang <sup>1#</sup>, Yukun Chen <sup>1</sup>, Yingying Li <sup>1</sup>, Xiaohan Liang <sup>1</sup>, Jingwen Zhang <sup>1</sup>, Fuqiang Fan <sup>1</sup>, Ping Wu <sup>2</sup>, Chao Peng <sup>2</sup>, Bang Shen <sup>1, 3, 4 \*</sup>

<sup>1</sup> State Key Laboratory of Agricultural Microbiology, College of Veterinary Medicine, Huazhong Agricultural University, Wuhan, Hubei Province, 430070, PR China.

<sup>2</sup> National Facility for Protein Science in Shanghai, Zhangjiang Lab, Shanghai Advanced Research Institute, Chinese Academy of Science, Shanghai, 201210, PR China.

<sup>3</sup> Key Laboratory of Preventive Medicine in Hubei Province, Wuhan, Hubei Province, 430070, PR China.

<sup>4</sup> Hubei Hongshan Laboratory, Wuhan, Hubei Province, 430070, PR China.

# Equal contributions

\* Corresponding author: Bang Shen

Email: shenbang@mail.hzau.edu.cn

This PDF file includes:

Figures S1 - S11

Tables S1 – S4

Supplemental References

Unprocessed blots and uncropped gels for supplementary figures

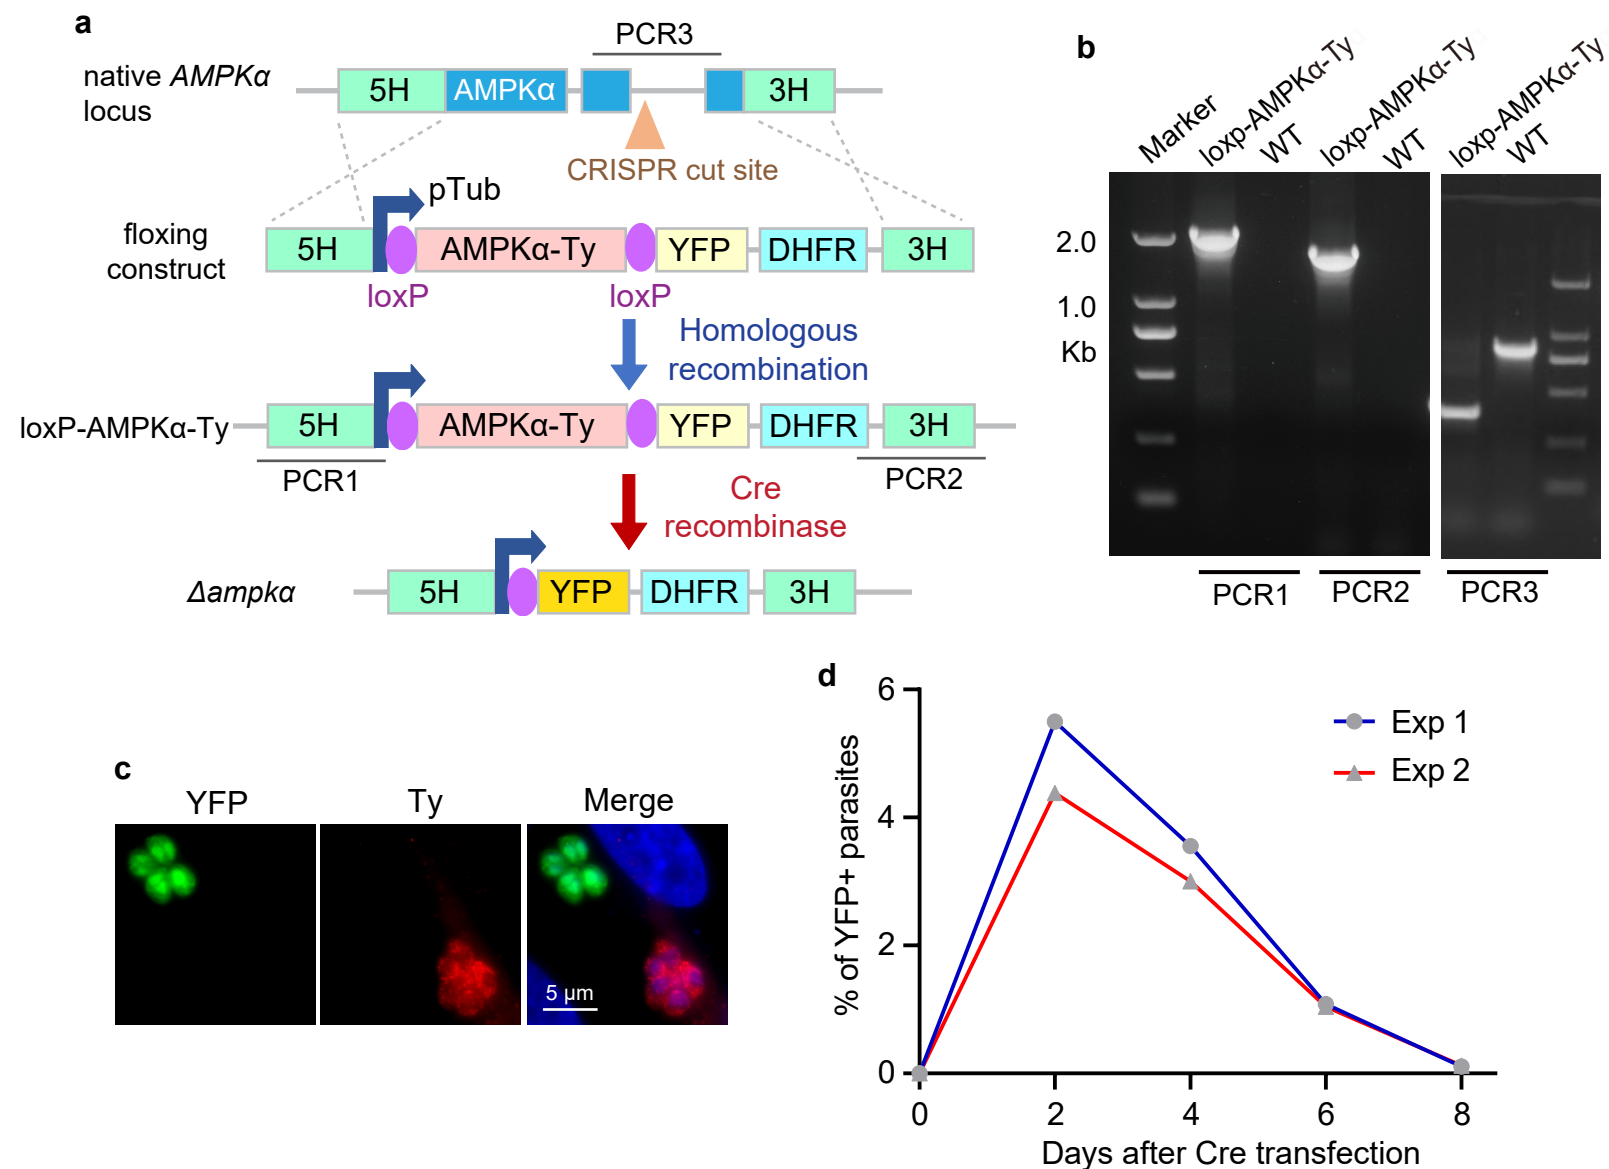

**Fig S1.** Construction and phenotypic analyses of a loxP-AMPKα-Ty strain. **a**, CRISPR/Cas9 mediated homologous recombination replacing endogenous AMPKα with loxP flanked AMPKα to construct the loxP-AMPKα-Ty strain. Then, a plasmid expressing the Cre recombinase was transfected into the loxP-AMPKα-Ty strain to induce recombination between two loxP sites, which would delete AMPKα and move YFP close to the pTub to activate its expression. As such, YFP expression could be used as a reporter for AMPKα deletion. **b**, diagnostic PCRs on a loxP-AMPKα-Ty clone. **c**, IFA examination of YFP and AMPKα-Ty expression in the loxP-AMPKα-Ty strain 24 hours post the transfection with the Cre expression plasmid. **d**, the percentage of YFP<sup>+</sup> parasites in the population after transfecting the Cre expressing plasmid into the loxP-AMPKα-Ty strain, as determined by flow cytometry at indicated time points. The two curves represent n=2 independent experiments. Source data are provided as a Source data file.

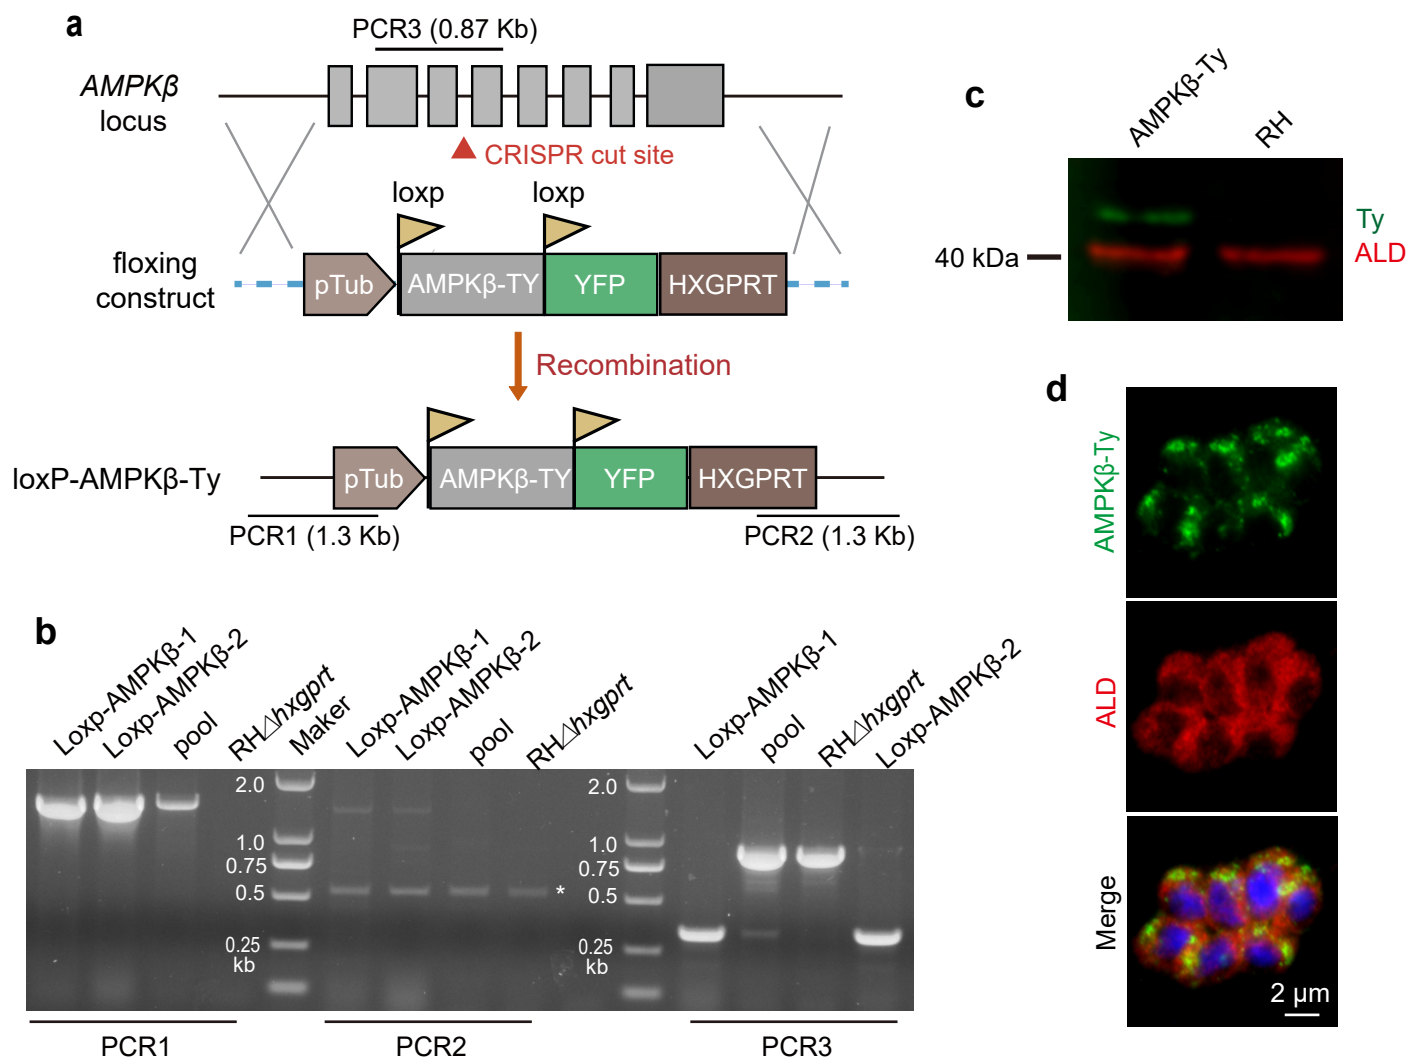

**Fig S2.** Construction and verification of a RH loxP-AMPK $\beta$ -Ty strain used for Co-IP to identify proteins interacting with AMPK $\beta$ . **a**, schematic illustration of loxP-AMPK $\beta$ -Ty strain construction using CRISPR/Cas9 assisted recombination to replace endogenous AMPK $\beta$  with a Ty tagged and loxP flanked copy of AMPK $\beta$ . **b**, diagnostic PCRs on two loxP-AMPK $\beta$ -Ty clones and the drug resistant pool after transfection. \* non-specific amplification. **c-d**, Western blotting (c) and IFA (d) to confirm the expression of Ty tagged AMPK $\beta$  in the loxP-AMPK $\beta$ -Ty strain. Source data are provided as a Source data file.

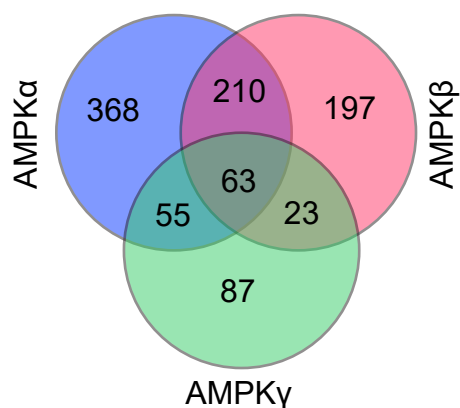

**Fig S3. Venn diagram showing the overlap of proteins identified by co-IPs using different AMPK subunits as baits.** For each co-IP experiment, proteins satisfying the following criteria were treated as hits: no unique peptides were found in the control group, or the number of unique peptides in the experimental group was twice or more of that in the control group. Detailed lists of the identified proteins were provided in Table S1 and Supplementary data 1.

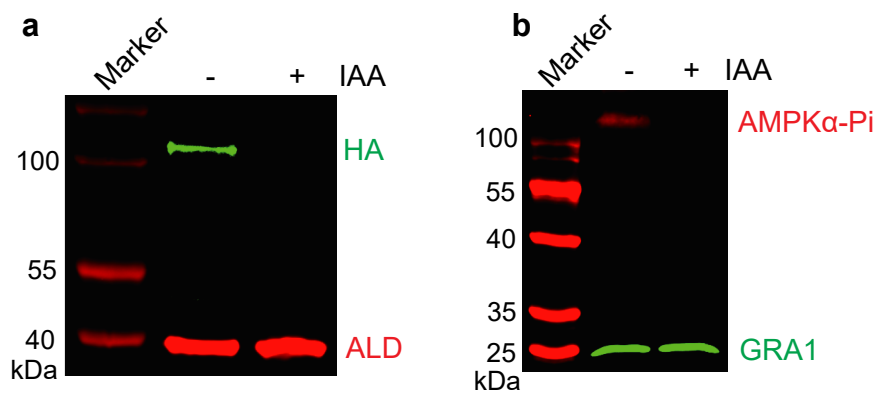

Fig S4. The phospho-AMPK $\alpha$ (Thr172) antibody specifically recognized TgAMPK $\alpha$  in *Toxoplasma* parasites, as revealed by Western blotting using the TgAMPK $\alpha$  depletion strain AMPK $\alpha$ -mAID. The AMPK $\alpha$ -mAID contained an auxin-inducible degron mAID (HA tagged) fused to the C-terminus of endogenous AMPK $\alpha$ . Therefore AMPK $\alpha$  could be depleted by IAA treatment. The Western blot was performed using lysates prepared from purified parasites of the AMPK $\alpha$ -mAID strain that were treated with (+) or without (-) IAA treatment, and probed with anti-HA (a) to examine the protein level of TgAMPK $\alpha$  or anti-phospho-AMPK $\alpha$ (Thr172) (b) to check the level of phosphorylated TgAMPK $\alpha$ . GRA1 and ALD were included as loading controls. Source data are provided as a Source data file.

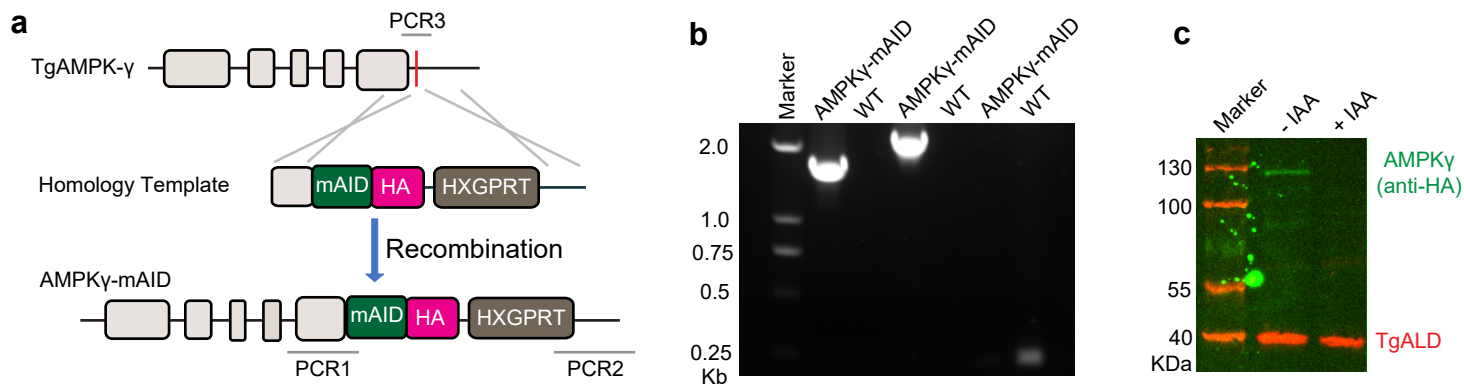

**Fig S5.** Construction of the AMPK $\gamma$ -mAID strain for IAA induced AMPK $\gamma$  depletion. **a**, schematic illustration of adding a mAID tag to the C terminus of AMPK $\gamma$  at the endogenous locus, through CRISPR/Cas9 induced homologous recombination. The red bar indicates the CRISPR targeting site. **b**, Diagnostic PCR on an AMPK $\gamma$ -mAID clone. **c**, Depletion of AMPK $\gamma$  expression in the AMPK $\gamma$ -mAID strain after 48 hours' IAA treatment, as determined by Western blotting. Source data are provided as a Source data file.

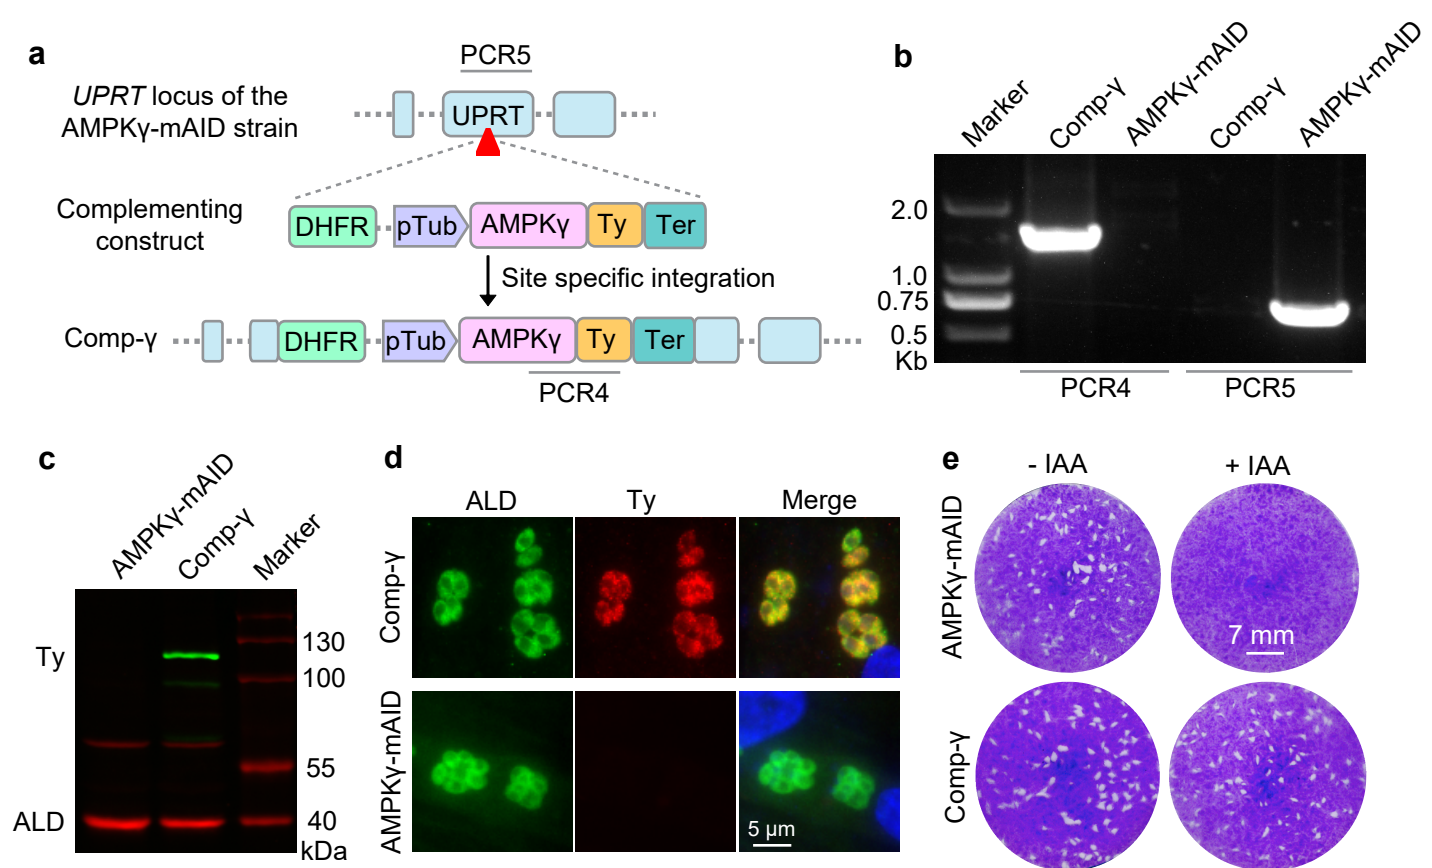

**Fig S6.** Construction and characterization of an AMPK $\gamma$  complementation strain in the AMPK $\gamma$ -mAID mutant. **a**, schematic illustration of inserting an AMPK $\gamma$  expressing cassette into the *UPRT* locus of the AMPK $\gamma$ -mAID mutant to construct the complementation strain Comp- $\gamma$ , through CRISPR/Cas9 induced site-specific integration. The red triangle indicates the CRISPR targeting site. **b**, Diagnostic PCR on a Comp- $\gamma$  clone. **c-d**, Western blotting (c) and immunofluorescent staining (d) checking the expressing of complementing AMPK $\gamma$ . **e**, plaque assay examining the restore of parasite growth after AMPK $\gamma$  complementation. Tachyzoites of the indicated strains were cultured in HFF monolayers for 7 days with or without IAA treatment. The plaques formed were visualized after crystal violet staining. Source data are provided as a Source data file.

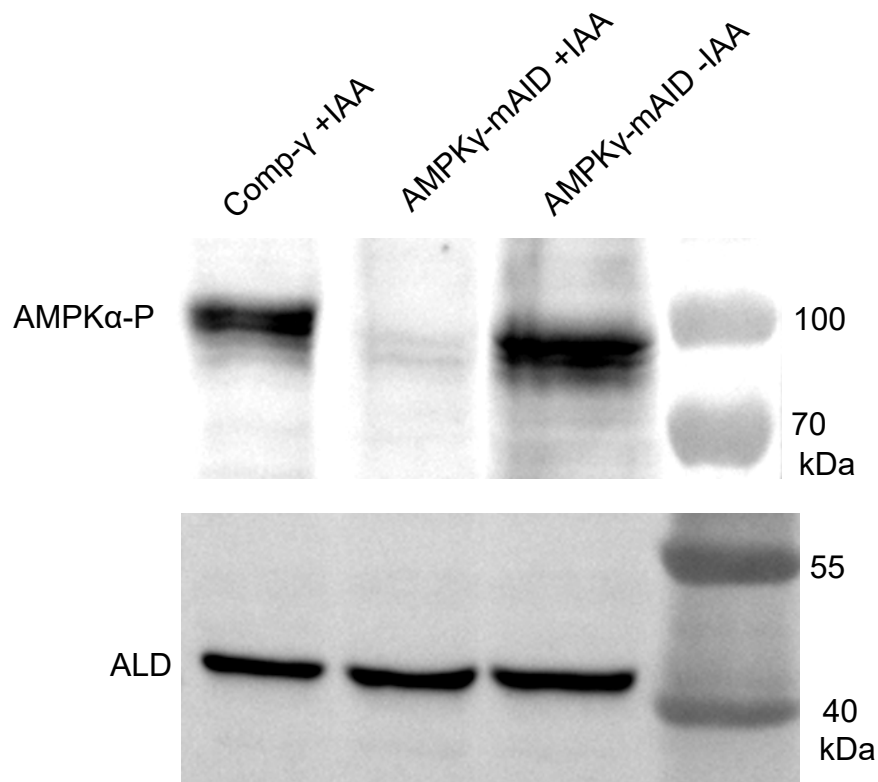

**Fig S7.** Restore of AMPKα phosphorylation in AMPKγ depletion mutants by AMPKγ complementation. Extracellular parasites pretreated with or without IAA were subject to Western blot analyses, using antibodies against phosphorylated AMPKα (anti phospho-AMPKα(Thr172)) and *Toxoplasma* ALD. Source data are provided as a Source data file.

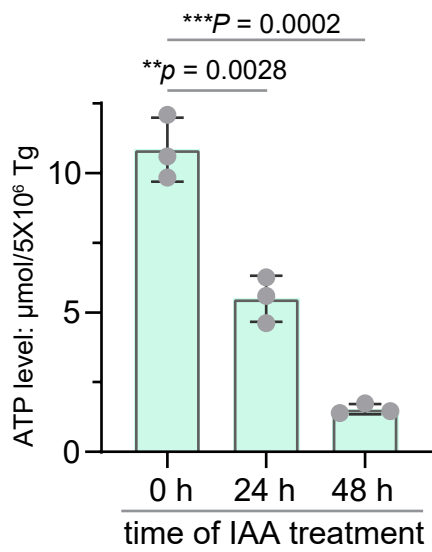

**Fig S8. Decrease of cellular ATP after AMPK $\gamma$  depletion.**

Intracellular parasites of the AMPK $\gamma$ -mAID strain were treated with IAA for 0, 24 or 48 hours before harvest. Then the parasites were needle released from host cells, purified by filtration and the ATP level was determined using a bioluminescence-based ATP assay kit. The experiment was repeated  $n=3$  times independently. Means  $\pm$  SD, unpaired two-tailed Student's t-test. Source data are provided as a Source data file.

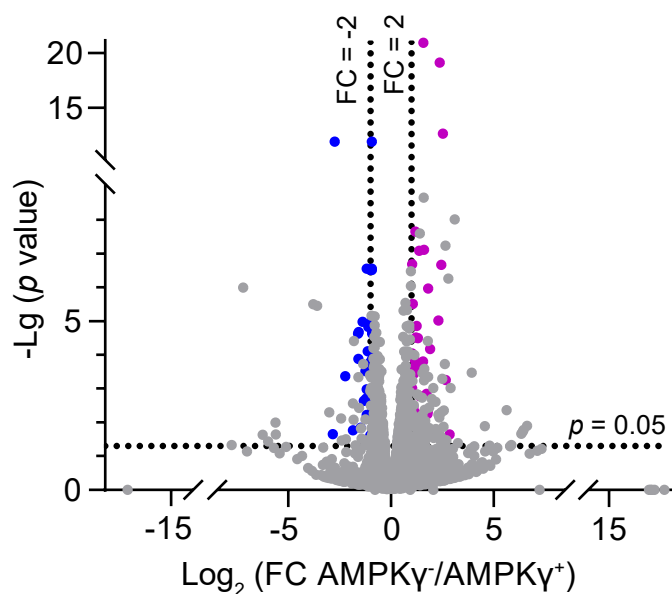

**Fig S9.** Volcano plot showing the gene expression change upon AMPK $\gamma$  depletion. The AMPK $\gamma$ -mAID parasites pretreated with or without IAA for 24 hours were subjected to RNA-Seq analysis. The fold change (FC) of each gene and the corresponding  $p$ -value (determined by the Wald test in DEseq2) were graphed. Each sample was examined  $n=3$  times independently. Blue and purple dots represent differentially expressed genes, which were identified according to the following criteria:  $FC \geq 2$  or  $\leq -2$ ,  $p\text{-value} \leq 0.05$ , the average TPM value in at least one group (AMPK $\gamma^-$  or AMPK $\gamma^+$ ) was over 10.

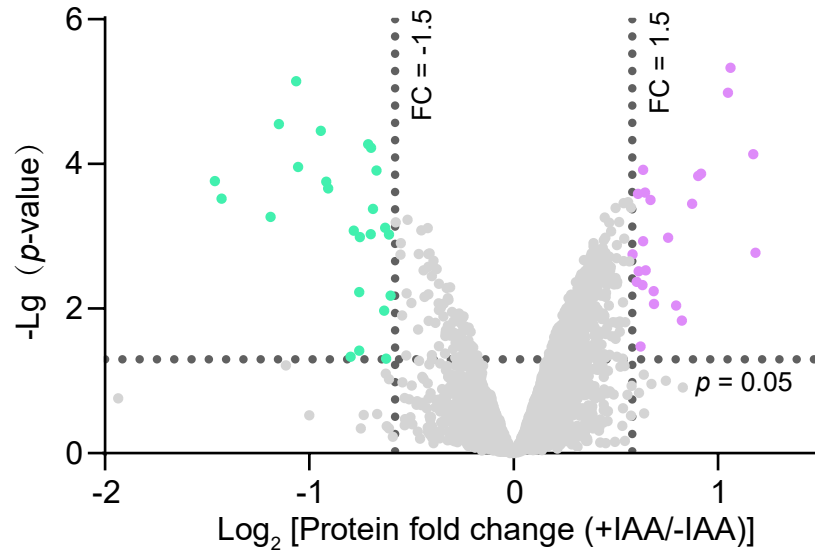

**Fig S10.** Protein abundance changes caused by TgAMPK $\gamma$  depletion in the AMPK $\gamma$ -mAID strain, as determined by quantitative proteomics. The AMPK $\gamma$ -mAID parasites pretreated with or without IAA for 48 hours were released from host cells by needle passage and then subjected to LC-MS/MS analysis. This experiment was performed side by side with the phosphoproteomic experiment presented in Fig 7 and the same n=3 sets of samples were used, except that no phospho-peptide enrichment step was involved. *P* values were determined by Empirical Bayes two-tailed tests.

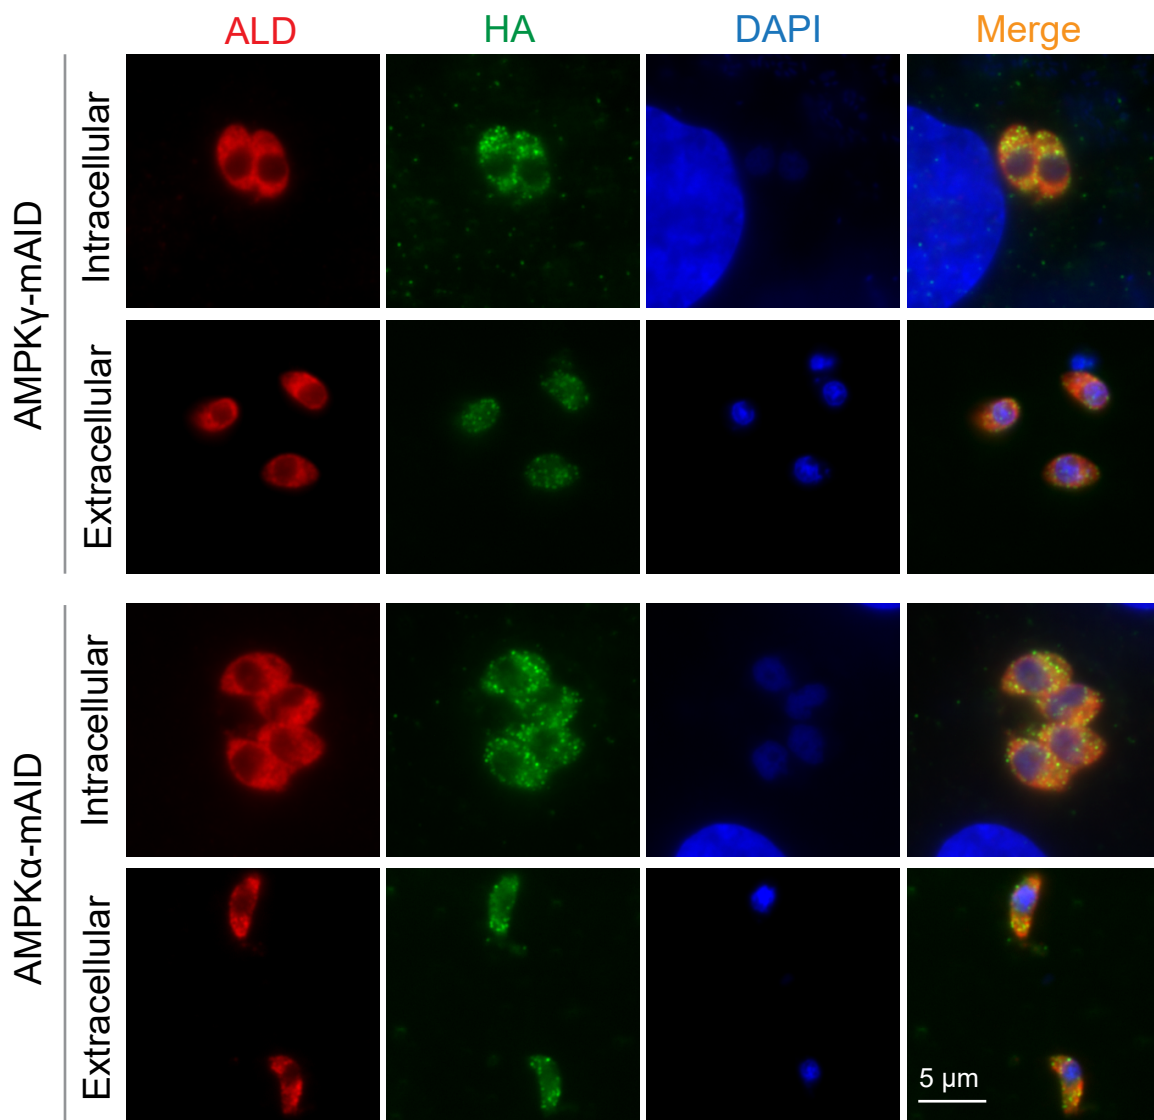

**Fig S11.** Localization of AMPK $\alpha$  and AMPK $\gamma$  in intracellular and extracellular parasites of the AMPK $\alpha$ -mAID and AMPK $\gamma$ -mAID strains (which contained an HA tag at the C-termini of endogenous AMPK $\alpha$  or AMPK $\gamma$ ). Intracellular or freshly released extracellular parasites obtained by syringe passage were fixed with paraformaldehyde, permeabilized with triton X-100 and probed with anti-ALD and anti-HA. AMPK $\alpha$  and AMPK $\gamma$  were largely absent in parasite nuclei in intracellular parasites. However, more than 85% of AMPK $\gamma$ -mAID and close to 50% of AMPK $\alpha$ -mAID parasites contained identifiable signal in the nuclei at the extracellular stage. Source data are provided as a Source data file.

**Table S1. *Toxoplasma* proteins identified in all AMPK subunits based co-Ips**

| Gene ID      | Product Description                                             | AMPK $\alpha$    |                      | AMPK $\beta$     |                      | AMPK $\gamma$    |                      |
|--------------|-----------------------------------------------------------------|------------------|----------------------|------------------|----------------------|------------------|----------------------|
|              |                                                                 | Exp <sup>1</sup> | Control <sup>2</sup> | Exp <sup>1</sup> | Control <sup>2</sup> | Exp <sup>1</sup> | Control <sup>2</sup> |
| TGGT1_268960 | AMPK $\beta$                                                    | 11               | 0                    | 80               | 0                    | 6                | 0                    |
| TGGT1_239870 | AMPK $\gamma$                                                   | 49               | 0                    | 65               | 0                    | 25               | 0                    |
| TGGT1_226910 | Amylo-alpha-1,6-glucosidase                                     | 7                | 2                    | 42               | 0                    | 2                | 1                    |
| TGGT1_233905 | AMPK $\alpha$                                                   | 49               | 0                    | 28               | 0                    | 14               | 0                    |
| TGGT1_253430 | putative asparagine synthetase                                  | 10               | 4                    | 18               | 9                    | 10               | 5                    |
| TGGT1_289600 | heat shock protein HSP29                                        | 2                | 1                    | 14               | 0                    | 2                | 1                    |
| TGGT1_278870 | myosin F                                                        | 16               | 4                    | 12               | 1                    | 1                | 0                    |
| TGGT1_286270 | hypothetical protein                                            | 3                | 0                    | 11               | 0                    | 12               | 0                    |
| TGGT1_235020 | putative COPI protein                                           | 12               | 1                    | 8                | 0                    | 1                | 0                    |
| TGGT1_263130 | putative citrate synthase                                       | 7                | 1                    | 8                | 1                    | 2                | 1                    |
| TGGT1_268200 | RNA recognition motif-containing protein                        | 9                | 4                    | 8                | 2                    | 4                | 2                    |
| TGGT1_232130 | hypothetical protein                                            | 8                | 4                    | 7                | 3                    | 4                | 2                    |
| TGGT1_266640 | Acetyl-coenzyme A synthetase                                    | 11               | 2                    | 7                | 0                    | 6                | 3                    |
| TGGT1_228170 | inner membrane complex protein IMC2A                            | 15               | 1                    | 6                | 2                    | 2                | 1                    |
| TGGT1_263070 | CMGC kinase, CK2 family                                         | 10               | 4                    | 6                | 1                    | 2                | 1                    |
| TGGT1_269980 | putative preprotein translocase Sec61                           | 10               | 5                    | 6                | 3                    | 5                | 2                    |
| TGGT1_292920 | putative heat shock protein 75                                  | 9                | 2                    | 6                | 2                    | 1                | 0                    |
| TGGT1_313140 | isocitrate dehydrogenase                                        | 8                | 2                    | 6                | 2                    | 2                | 1                    |
| TGGT1_213670 | hypothetical protein                                            | 2                | 1                    | 5                | 0                    | 1                | 0                    |
| TGGT1_256770 | putative eukaryotic translation initiation factor 4A, isoform 3 | 17               | 4                    | 5                | 2                    | 1                | 0                    |
| TGGT1_263870 | glutamate-tRNA ligase                                           | 4                | 0                    | 5                | 0                    | 3                | 1                    |
| TGGT1_247470 | putative nucleolar protein                                      | 11               | 4                    | 4                | 2                    | 1                | 0                    |
| TGGT1_289830 | putative eukaryotic initiation factor-3, delta subunit          | 10               | 3                    | 4                | 2                    | 1                | 0                    |

|              |                                                             |   |   |   |   |   |   |
|--------------|-------------------------------------------------------------|---|---|---|---|---|---|
| TGGT1_310640 | phosphorylase family protein                                | 1 | 0 | 4 | 1 | 3 | 1 |
| TGGT1_229950 | putative 26S proteasome regulatory subunit 6b               | 9 | 4 | 3 | 0 | 2 | 0 |
| TGGT1_267080 | putative 26S protease regulatory subunit 4                  | 6 | 0 | 3 | 1 | 4 | 0 |
| TGGT1_290660 | RNA recognition motif-containing protein                    | 7 | 0 | 3 | 1 | 6 | 3 |
| TGGT1_310700 | serine/threonine phosphatase PP1                            | 8 | 2 | 3 | 0 | 2 | 0 |
| TGGT1_312200 | serine/threonine protein phosphatase                        | 2 | 0 | 3 | 0 | 1 | 0 |
| TGGT1_313230 | eukaryotic initiation factor-2, alpha subunit               | 2 | 0 | 3 | 0 | 1 | 0 |
| TGGT1_320020 | transporter, major facilitator family protein               | 3 | 1 | 3 | 1 | 2 | 1 |
| TGGT1_202390 | S15 sporozoite-expressed protein                            | 2 | 1 | 2 | 0 | 2 | 1 |
| TGGT1_208560 | carrier superfamily protein                                 | 1 | 0 | 2 | 0 | 1 | 0 |
| TGGT1_209720 | hypothetical protein                                        | 2 | 1 | 2 | 1 | 2 | 0 |
| TGGT1_217820 | PCI domain-containing protein                               | 5 | 2 | 2 | 0 | 5 | 2 |
| TGGT1_227960 | PCI domain-containing protein                               | 7 | 1 | 2 | 0 | 2 | 1 |
| TGGT1_243800 | putative long-chain fatty acid CoA ligase                   | 3 | 1 | 2 | 0 | 2 | 0 |
| TGGT1_243960 | nuclear transport factor 2 (ntf2) domain-containing protein | 4 | 0 | 2 | 0 | 2 | 0 |
| TGGT1_245450 | hypothetical protein                                        | 2 | 1 | 2 | 0 | 1 | 0 |
| TGGT1_246580 | hypothetical protein                                        | 5 | 1 | 2 | 1 | 2 | 0 |
| TGGT1_283850 | peptidyl-prolyl cis-trans isomerase                         | 4 | 2 | 2 | 0 | 1 | 0 |
| TGGT1_286630 | redoxin domain-containing protein                           | 2 | 1 | 2 | 0 | 1 | 0 |
| TGGT1_295360 | hypothetical protein                                        | 5 | 1 | 2 | 0 | 1 | 0 |
| TGGT1_297810 | hypothetical protein                                        | 4 | 2 | 2 | 0 | 5 | 2 |
| TGGT1_202490 | AP2 domain transcription factor AP2VIIa-7                   | 2 | 1 | 1 | 0 | 1 | 0 |

|               |                                                    |   |   |   |   |   |   |
|---------------|----------------------------------------------------|---|---|---|---|---|---|
| TGGT1_202770  | RNA recognition motif-containing protein           | 1 | 0 | 1 | 0 | 2 | 1 |
| TGGT1_216590  | HEAT repeat-containing protein                     | 7 | 1 | 1 | 0 | 2 | 1 |
| TGGT1_222380  | importin-beta N-terminal domain-containing protein | 2 | 0 | 1 | 0 | 1 | 0 |
| TGGT1_223960  | ubiquitin interaction motif family protein         | 2 | 0 | 1 | 0 | 1 | 0 |
| TGGT1_226430  | reticulon protein                                  | 2 | 1 | 1 | 0 | 2 | 1 |
| TGGT1_233110  | IMP dehydrogenase                                  | 3 | 0 | 1 | 0 | 1 | 0 |
| TGGT1_237010  | hypothetical protein                               | 1 | 0 | 1 | 0 | 1 | 0 |
| TGGT1_246940  | hypothetical protein                               | 1 | 0 | 1 | 0 | 1 | 0 |
| TGGT1_247790  | VRR-NUC domain-containing protein                  | 1 | 0 | 1 | 0 | 1 | 0 |
| TGGT1_255420  | hypothetical protein                               | 5 | 2 | 1 | 0 | 2 | 1 |
| TGGT1_260820  | IMC sub-compartment protein ISP1                   | 6 | 3 | 1 | 0 | 6 | 3 |
| TGGT1_261440  | ARM repeats containing protein                     | 2 | 0 | 1 | 0 | 1 | 0 |
| TGGT1_262040  | SAC3/GANP family protein                           | 5 | 0 | 1 | 0 | 2 | 1 |
| TGGT1_277500  | putative 26S proteasome regulatory subunit 7       | 5 | 0 | 1 | 0 | 1 | 0 |
| TGGT1_285980A | glucosephosphate-mutase GPM1                       | 1 | 0 | 1 | 0 | 1 | 0 |
| TGGT1_300060  | signal peptidase subunit protein                   | 2 | 1 | 1 | 0 | 2 | 1 |
| TGGT1_309140  | transducin beta-like protein TBL1                  | 1 | 0 | 1 | 0 | 1 | 0 |
| TGGT1_310150  | AMP-binding enzyme domain-containing protein       | 5 | 0 | 1 | 0 | 3 | 0 |

<sup>1</sup> Number of unique peptides in the experimental group.

<sup>2</sup> Number of unique peptides in the corresponding control group.

**Table S2. *Toxoplasma gondii* strains used in this study**

| Name                                                        | Description                                                                                                                                                    | Use                                                                                                                                                    | Source           |
|-------------------------------------------------------------|----------------------------------------------------------------------------------------------------------------------------------------------------------------|--------------------------------------------------------------------------------------------------------------------------------------------------------|------------------|
| RH $\Delta hvgprt$ Tir1                                     | Express OsTir1, contain the <i>CAT</i> selection marker                                                                                                        | For the construction of AID tagged strains                                                                                                             | Reference 1      |
| RH $\Delta hvgprt$                                          | Type I strain RH with <i>HXGPRT</i> deletion                                                                                                                   | Parental strain                                                                                                                                        | Dr. David Sibley |
| RH $\Delta hvgprt$ /LoxP- <i>AMPK<math>\alpha</math>-TY</i> | Express AMPK $\alpha$ -TY from the pTub promoter, contain the <i>HXGPRT</i> selection marker                                                                   | For Co-IP to identify proteins interacting with AMPK $\alpha$                                                                                          | This study       |
| RH $\Delta hvgprt$ /LoxP- <i>AMPK<math>\beta</math>-TY</i>  | Express AMPK $\beta$ -TY from the pTub promoter, contain the DHFR-Ts selection marker                                                                          | For Co-IP to identify proteins interacting with AMPK $\beta$                                                                                           | This study       |
| AMPK $\gamma$ -mAID                                         | mAID-HA fused to the C terminus of endogenous <i>AMPK<math>\gamma</math></i> in the RH $\Delta hvgprt$ Tir1 strain, contain the <i>HXGPRT</i> selection marker | For IAA induced depletion of AMPK $\gamma$ in the RH $\Delta hvgprt$ Tir1 strain, as well as Co-IP to identify proteins interacting with AMPK $\gamma$ | This study       |
| Comp- $\gamma$                                              | Expressing AMPK $\gamma$ -TY by the pTub promoter from the <i>UPRT</i> locus of the AMPK $\gamma$ -mAID strain, contain the DHFR-Ts selection marker           | Complementation of the AMPK $\gamma$ depletion strain AMPK $\gamma$ -mAID                                                                              | This study       |
| AMPK $\gamma$ -mAID /AMPK $\alpha$ -T221T-TY                | Express AMPK $\alpha$ (T221T)-TY by the pTub promoter from the <i>UPRT</i> locus of the AMPK $\gamma$ -mAID strain, contain the DHFR-Ts selection marker       | To check the over-expression of AMPK $\alpha$ -T221T on the growth of the AMPK $\gamma$ depletion strain AMPK $\gamma$ -mAID                           | This study       |
| AMPK $\gamma$ -mAID /AMPK $\alpha$ -T221D-TY                | Express AMPK $\alpha$ (T221D)-TY by the pTub promoter from the <i>UPRT</i> locus of the AMPK $\gamma$ -mAID strain, contain the DHFR-Ts selection marker       | To check the over-expression of AMPK $\alpha$ -T221D on the growth of the AMPK $\gamma$ depletion strain AMPK $\gamma$ -mAID                           | This study       |
| AMPK $\gamma$ -mAID /AMPK $\alpha$ -T221A-TY                | Express AMPK $\alpha$ (T221A)-TY by the pTub promoter from the <i>UPRT</i> locus of the AMPK $\gamma$ -mAID strain, contain the DHFR-Ts selection marker       | To check the over-expression of AMPK $\alpha$ -T221A on the growth of the AMPK $\gamma$ depletion strain AMPK $\gamma$ -mAID                           | This study       |
| AMPK $\alpha$ -mAID                                         | mAID-HA fused to the C terminus of endogenous <i>AMPK<math>\alpha</math></i> in the RH $\Delta hvgprt$ Tir1 strain, contain the <i>HXGPRT</i> selection marker | For IAA induced depletion of AMPK $\alpha$ in the RH $\Delta hvgprt$ Tir1 strain                                                                       | This study       |

**Table S3. Plasmids used in this study**

| Plasmids                                     | Construction methods                                                                                      | Use                                                                                                                                                                                                                                                          |
|----------------------------------------------|-----------------------------------------------------------------------------------------------------------|--------------------------------------------------------------------------------------------------------------------------------------------------------------------------------------------------------------------------------------------------------------|
| pSAG1-Cas9-sgUPRT                            | Reference 2                                                                                               | <i>UPRT</i> -specific CRISPR plasmid and template for gene-specific CRISPR plasmid construction                                                                                                                                                              |
| pSAG1::Cas9-sgAMPK $\gamma$ -3UTR            | Replace sgUPRT in pSAG1-Cas9-sgUPRT with sgAMPK $\gamma$                                                  | <i>AMPK<math>\gamma</math></i> specific CRISPR plasmid, for the construction of AMPK $\gamma$ -mAID strain                                                                                                                                                   |
| pTUB1:YFP-mAID-3HA- HXGPRT                   | Reference 1                                                                                               | Template for mini-AID-HXGPRT amplification                                                                                                                                                                                                                   |
| pUC19-AMPK $\gamma$ -3HA- HXGPRT             | Clone mini-AID-HXGPRT, 5' and 3' homology arms of AMPK $\gamma$ into pUC19                                | Homology template for the construction of AMPK $\gamma$ -mAID                                                                                                                                                                                                |
| pTUB1-GOI-Ty-YFP-DHFR*                       | GOI-Ty-YFP fusion driven by the TUB1 promoter with the DHFR* as drug selectable marker.                   | Template for pG265-UPRT::AMPK $\gamma$ -DHFR* construction                                                                                                                                                                                                   |
| pSAG1:Cas9-sgAMPK $\alpha$                   | Replace sgUPRT in pSAG1-Cas9-sgUPRT with sgAMPK $\alpha$                                                  | AMPK $\alpha$ specific CRISPR plasmid, for the construction of RH $\Delta$ hxgprt /LoxP-AMPK $\alpha$ -TY strain                                                                                                                                             |
| pDONR-G265                                   | From the Sibley Lab                                                                                       | Template for pTUB1: LoxP- killer-red - LoxP-YFP- HXGPRT amplification                                                                                                                                                                                        |
| pTUB1::AMPK $\alpha$ -Ty-YFP- DHFR*          | Clone the AMPK $\alpha$ coding sequence into pTUB1-GOI-Ty-YFP-DHFR*                                       | Intermediate plasmid for pTUB1::5H-AMPK-Ty-YFP- DHFR* -3H                                                                                                                                                                                                    |
| pTUB1::5H-AMPK-Ty-YFP- DHFR* -3H             | Insert the 5' and 3' homology arms of AMPK $\alpha$ into pTUB1::AMPK $\alpha$ -Ty-YFP- DHFR*              | Homology template for the construction of RH $\Delta$ hxgprt /LoxP-AMPK $\alpha$ -TY strain                                                                                                                                                                  |
| pSAG1:Cas9-sgAMPK $\beta$                    | Replace sgUPRT in pSAG1-Cas9-sgUPRT with sg AMPK $\beta$                                                  | AMPK $\beta$ specific CRISPR plasmid, for the construction of RH $\Delta$ hxgprt /LoxP-AMPK $\beta$ -TY strain                                                                                                                                               |
| pG265- 5H-LoxP-killer-red-LoxP-YFP-HXGPRT-3H | Insert the 5' and 3' homology arms of AMPK $\beta$ into pDONR-G265                                        | Intermediate plasmid for pTUB1-Loxp-AMPK $\beta$ -TY-LoxP-YFP-HXGPRT                                                                                                                                                                                         |
| pTUB1-Loxp-AMPK $\beta$ -TY-LoxP-YFP-HXGPRT  | Replace killer-red in pDONR-G265 with AMPK $\beta$ -TY                                                    | Homology template for the construction of RH $\Delta$ hxgprt /Loxp-AMPK $\beta$ -TY strain                                                                                                                                                                   |
| pG265-UPRT::AMPK $\gamma$ -DHFR*             | Clone the AMPK $\gamma$ coding sequence into pTUB1-GOI-Ty-YFP-DHFR*                                       | Deliver the <i>AMPK<math>\gamma</math></i> Expressing cassette to the <i>UPRT</i> locus, for the construction of the complementation strain Comp- $\gamma$ . It was also used as template for the construction of pG265-UPRT::AMPK $\alpha$ -T221T/A/D-DHFR* |
| pG265-UPRT::AMPK $\alpha$ -221T- DHFR *      | Replace AMPK $\gamma$ in pG265-UPRT::AMPK $\gamma$ -DHFR* with the coding sequence of AMPK $\alpha$       | Homology template for the construction of AMPK $\gamma$ -mAID /AMPK $\alpha$ -T221T-TY strain                                                                                                                                                                |
| pG265-UPRT::AMPK $\alpha$ -221D- DHFR*       | Replace AMPK $\gamma$ in pG265-UPRT::AMPK $\gamma$ -DHFR* with the coding sequence of AMPK $\alpha$ -221D | Homology template for the construction of AMPK $\gamma$ -mAID /AMPK $\alpha$ -T221D-TY strain                                                                                                                                                                |
| pG265-UPRT::AMPK $\alpha$ -221A- DHFR*       | Replace AMPK $\gamma$ in pG265-UPRT::AMPK $\gamma$ -DHFR* with the coding sequence of AMPK $\alpha$ -221A | Homology template for the construction of AMPK $\gamma$ -mAID /AMPK $\alpha$ -T221A-TY strain                                                                                                                                                                |
| pSAG1:Cas9-sgAMPK $\alpha$ (AID)             | Replace sgUPRT in pSAG1-Cas9-sgUPRT with sg AMPK $\alpha$ (AID)                                           | AMPK $\alpha$ specific CRISPR plasmid, for the construction of AMPK $\alpha$ -mAID strain                                                                                                                                                                    |
| pAMPK $\alpha$ -mAID                         | Clone mini-AID-HXGPRT, 5' and 3' homology arms of AMPK $\alpha$ into pUC19                                | Homology template for the construction of AMPK $\alpha$ -mAID strain                                                                                                                                                                                         |

**Table S4. Primers used in this study**

| Primers                    | Sequence (5'-3')                           | Use                                                                                                                                               |
|----------------------------|--------------------------------------------|---------------------------------------------------------------------------------------------------------------------------------------------------|
| AMPK $\gamma$ -AID-sgRNA-F | GGAACGGCCAGACGTCGCCTGT                     | To construct the AMPK $\gamma$ -specific CRISPR plasmid pSAG1::Cas9-U6::sg-AMPK $\gamma$ -3UTR                                                    |
| sgRNA-R                    | TTTAGAGCTAGAAATAGC                         |                                                                                                                                                   |
|                            | AACTTGACATCCCCATTTAC                       |                                                                                                                                                   |
| pUC19-AID-F                | GGTACCCGGGGATCCTCTAGA                      | Amplify the pUC19 backbone from pTUB1:YFP-mAID-3HA-HXGPRT for pUC19-AMPK $\gamma$ -3HA-HXGPRT construction                                        |
| pUC19-AID-R                | CATATGGTGCACCTCTCAGTACAATCTG               |                                                                                                                                                   |
| AMPK $\gamma$ -AID-F       | CCTAGGATGGTGAGCGCTAGCA                     | Amplify mini-AID-HXGPRT from pTUB1:YFP-mAID-3HA-HXGPRT for pUC19-AMPK $\gamma$ -3HA-HXGPRT construction                                           |
| AMPK $\gamma$ -AID-R       | CCCATTGCGCCATTCAGGCTG                      |                                                                                                                                                   |
| AMPK $\gamma$ -AID-5H-F    | TACTGAGAGTGCACCATATG                       | Amplify the 5' homologous arm from gDNA of AMPK $\gamma$ for pUC19-AMPK $\gamma$ -3HA-HXGPRT construction                                         |
| AMPK $\gamma$ -AID-5H-R    | ACAGAAGTCCAGCGGATCTGGG                     |                                                                                                                                                   |
|                            | TGCTAGCGCTCACCATCCTAGGATCTGAGGAAATCCTCTGG  |                                                                                                                                                   |
| AMPK $\gamma$ -AID-3H-F    | CAGCCTGAATGGCGAATGGGGACTG                  | Amplify the 3' homologous arm from gDNA of AMPK $\gamma$ for pUC19-AMPK $\gamma$ -3HA-HXGPRT construction                                         |
| AMPK $\gamma$ -AID-3H-R    | ACTCACTCTGGAAAG                            |                                                                                                                                                   |
|                            | CTAGAGGATCCCCGGGTACCCGGCCGTACGTCAGAAAATAG  |                                                                                                                                                   |
| AID-PCR1-F                 | CATTTCTATGCGGCCAGAG                        | Diagnostic PCRs for the identification of AMPK $\gamma$ -mAID clones                                                                              |
| AID-PCR1-R                 | GGCAAGAGACCATCACGTTC                       |                                                                                                                                                   |
| AID-PCR2-F                 | GCGTTGGCCTACGTGACTTG                       |                                                                                                                                                   |
| AID-PCR2-R                 | AACACAGAGCGCCGTTTCAG                       |                                                                                                                                                   |
| AID-PCR3-F                 | GAAGGCCAAGAAGGCGAAAG                       |                                                                                                                                                   |
| AID-PCR3-R                 | CTCTGCGCTGCATTTCTGTC                       |                                                                                                                                                   |
| pDG265-F                   | GAGGTCCACACGAACCAGGA                       | Amplify the vector backbone from pTUB1-GOI-Ty-YFP-DHFR* for pG265-UPRT::AMPK $\gamma$ -DHFR* or pG265-UPRT::AMPK $\alpha$ 221T-DHFR* construction |
| pDG265-R                   | TTTGTCGGAATTCTATAACTTCGTATAA               |                                                                                                                                                   |
| ampk $\gamma$ -CDS-F       | GAAGTTATAGAATTCCGACAAAATGTCGCGCAGAGAAGAAGT | Amplify the AMPK $\gamma$ coding sequence from cDNA of RH for pG265-ptublin-UPRT:: AMPK $\gamma$ -DHFR* construction                              |
| ampk $\gamma$ -CDS-R       | GTCCATGCCGAGAGTGATCCTTAATCGAGCGGGTCCTGGT   |                                                                                                                                                   |
| AMPK $\gamma$ -comp-F      | GGCTAGGCGATTAAAGTTGGG                      | Amplify the UPRT:: AMPK $\gamma$ -DHFR* fragment from pG265-                                                                                      |
| AMPK $\gamma$ -comp-R      | GATTCCGTCAGCGGTCTGTC                       |                                                                                                                                                   |

|                                         |                                              |                                                                                                                              |
|-----------------------------------------|----------------------------------------------|------------------------------------------------------------------------------------------------------------------------------|
|                                         |                                              | UPRT::AMPK $\gamma$ -DHFR* to construct the Comp- $\gamma$ strain.                                                           |
| comp-PCR4-F                             | CTCCTTGGACGTGGACGTTTC                        | Diagnostic PCRs for the identification of Comp- $\gamma$ clones.                                                             |
| comp-PCR4-R                             | TCCTGGTTCGTGTGGACCTC                         |                                                                                                                              |
| comp-PCR5-F                             | CATGACCCACTTCAGTCTAC                         |                                                                                                                              |
| comp-PCR5-R                             | CCTCTTGCCTCCATAGTTTC                         |                                                                                                                              |
| T221T-F                                 | AGTTATAGAAATTCGACAAAATGTGC<br>ACGCCGGCATGG   | Amplify <i>AMPK<math>\alpha</math></i> -221T from cNDA for the construction of pG265-ptublin-UPRT::AMPK $\alpha$ -221T-DHFR* |
| T221T-R                                 | TCCTGGTTCGTGTGGACCTCCAGCCC<br>CCCGGTATCTATTC |                                                                                                                              |
| T221D-F                                 | GAGATGGAGACTTTTTGAAAGACTCT<br>TGTGGGTCTCCGAA | Amplification of AMPK $\alpha$ T221D-Vector for pG265-ptublin-UPRT::AMPK $\alpha$ T221A-DHFR*                                |
| T221D-R                                 | TTCGGAGACCCACAAGAGTCTTTCA<br>AAAAGTCTCCATCTC |                                                                                                                              |
| T221A-R                                 | TTCGGAGACCCACAAGATGCTTTCAA<br>AAAGTCTCCATCTC | Amplification of <i>AMPK<math>\alpha</math></i> T221A-Vector for pG265-ptublin-UPRT::AMPK $\alpha$ T221A- DHFR*              |
| T221A-F                                 | GAGATGGAGACTTTTTGAAAGCATCT<br>TGTGGGTCTCCGAA |                                                                                                                              |
| AMPK $\alpha$ -PCR4-F                   | CCCGAACATGAAGCGAGGAG                         | Diagnostic PCRs for the identification of AMPK $\gamma$ -mAID/AMPK $\alpha$ -221T/A/D clones.                                |
| comp-PCR4-R                             | TCCTGGTTCGTGTGGACCTC                         |                                                                                                                              |
| comp-PCR5-F                             | CATGACCCACTTCAGTCTAC                         |                                                                                                                              |
| comp-PCR5-R                             | CCTCTTGCCTCCATAGTTTC                         |                                                                                                                              |
| gRNA-AMPK $\beta$ -F                    | ACCTCAGACCGGTACCAGTG<br>GTTTTAGAGCTAGAAATAGC | To construct the <i>AMPK<math>\beta</math></i> specific CRISPR plasmid pSAG1:Cas9-U6: sgAMPK $\beta$                         |
| 5H-AMPK $\beta$ -F                      | CGTACCGCTAGCCAGGAAGAATGCTG<br>GCGGTGCTTGTTTC | Amplify the 5'-homology of AMPK $\beta$ from gDNA for pDONR-G265-5H-TUB1: loxP- killer-red -loxP-YFP- HXGPRT -3H             |
| 5H-AMPK $\beta$ -R                      | GAGCTTAAGACTGGCCGTCGCATGAC<br>GCTCTGAAGCTCG  |                                                                                                                              |
| TUB1-Loxp-killer-red-Loxp-YFP -HXGPRT-F | CGACGGCCAGTCTTAAGCTC                         | Amplify the TUB1-Loxp-killer-red-Loxp-YFP -HXGPRT fragment from pDONR-G265 for pDONR-G265-5H-                                |
| TUB1-Loxp-killer-red-Loxp-YFP -HXGPRT-R | CGCGCAATTAACCCTCACTA                         |                                                                                                                              |

|                                        |                                                                |                                                                                                                                                                     |
|----------------------------------------|----------------------------------------------------------------|---------------------------------------------------------------------------------------------------------------------------------------------------------------------|
|                                        |                                                                | TUB1: loxP- killer-red<br>-loxP-YFP- HXGPRT<br>-3H                                                                                                                  |
| 3H-AMPK $\beta$ -F                     | TAGTGAGGGTTAATTGCGCGCAGATG<br>CTACGTGGCTATCC                   | Amplify the 3'-<br>homology of AMPK $\beta$<br>from gDNA for<br>pDONR-G265-5H-<br>TUB1: loxP- killer-red<br>-loxP-YFP- HXGPRT<br>-3H                                |
| 3H-AMPK $\beta$ -R                     | GCTATGACCATGATTACGCCTATGTCG<br>TGTCTCCAGCGTG                   |                                                                                                                                                                     |
| pDONR-G265-<br>vector- AMPK $\beta$ -F | GGCGTAATCATGGTCATAGC                                           | Amplify the<br>Amplification of the<br>vector backbone from<br>pDONR-G265 for<br>pDONR-G265-5H-<br>TUB1: loxP- killer-red<br>-loxP-YFP- HXGPRT<br>-3H               |
| pDONR-G265-<br>vector- AMPK $\beta$ -R | TCTTCCTGGCTAGCGGTACG                                           |                                                                                                                                                                     |
| AMPK $\beta$ -CDS-F                    | ATAGAATTCCGACAAAATGGGATCTC<br>AGACGAGCAACAGT                   | Amplify the<br>AMPK $\beta$ -CDS-Ty<br>fragment from cDNA<br>for pDONR-G265-5H-<br>TUB1: LoxP-AMPK $\beta$ -<br>TY-LoxP-YFP-<br>HXGPRT-3H                           |
| AMPK $\beta$ -CDS-Ty-<br>R             | TTAATCGAGCGGGTCCTGGTTCGTGT<br>GGACCTCGGAAGACACACTTGGCGT<br>CTC |                                                                                                                                                                     |
| AMPK $\beta$ -CDS-<br>vector-F         | ACCAGGACCCGCTCGATTAACGAGG<br>ATATGCATAGATCTT                   | Amplify the<br>vector backbone of<br>AMPK $\beta$ -CDS-Ty<br>fragment for pDONR-<br>G265-5H-Tub: LoxP-<br>AMPK $\beta$ -TY-LoxP-<br>YFP- HXGPRT -3H<br>construction |
| AMPK $\beta$ -CDS-<br>vector-R         | CCATTTTGTGCGGAATTCTAT                                          |                                                                                                                                                                     |
| AMPK $\beta$ -PCR1-F                   | TCTATCGAACTGCCCCACTCC                                          | Diagnostic PCRs<br>for the identification of<br>RH <i>Ahxgprt</i> /Loxp-<br>AMPK $\beta$ -TY clones                                                                 |
| AMPK $\beta$ -PCR1-R                   | CAACTTAATCGCCTAGCCTG                                           |                                                                                                                                                                     |
| AMPK $\beta$ -PCR2-F                   | GCGGTGGAGCTCTGATCAGG                                           |                                                                                                                                                                     |
| AMPK $\beta$ -PCR2-R                   | GATGGCATGGTGACACTTAG                                           |                                                                                                                                                                     |
| AMPK $\beta$ -PCR3-F                   | GGATCTCAGACGAGCAACAG                                           |                                                                                                                                                                     |
| AMPK $\beta$ -PCR3-R                   | TGAAGACGCATGGCGTGAG                                            |                                                                                                                                                                     |
| F-AMPK $\alpha$ CDS                    | agttatagaattccgacaaaATGTGCACGCCGG<br>CATGG                     | Amplify the<br>AMPK $\alpha$ coding<br>sequence from cDNA<br>of RH for                                                                                              |
| R-AMPK $\alpha$ CDS                    | tcctgggtcgtgtggacctcCAGCCCCCGGTAT<br>CTATTC                    |                                                                                                                                                                     |

|                               |                                            |                                                                                                                                |
|-------------------------------|--------------------------------------------|--------------------------------------------------------------------------------------------------------------------------------|
|                               |                                            | pTUB1::AMPK $\alpha$ -Ty-YFP- DHFR*                                                                                            |
| pDG265-F                      | GAGGTCCACACGAACCAGGA                       | Amplify the vector backbone from pTUB1-GOI-Ty-YFP-DHFR* for pTUB1::AMPK $\alpha$ -Ty-YFP- DHFR*                                |
| pDG265-R                      | TTTGTTCGGAATTCTATAACTTCGTATA<br>A          |                                                                                                                                |
| F-5H- AMPK $\alpha$           | attgtactgagagtcaccaACCCCAAAAAGGA<br>TTCGCG | Amplify the 5' homologous arm from gDNA of AMPK $\alpha$ for pTUB1::5H-AMPK-Ty-YFP- DHFR* -3H                                  |
| R-5H- AMPK $\alpha$           | taagactggccgtcgTGTCTCCGGAACGAGA<br>GTCG    |                                                                                                                                |
| F-AMPK $\alpha$ -Ty-YFP-DHFR* | agacaCGACGGCCAGTCTTAAGCTC                  | Amplify the AMPK $\alpha$ -Ty-YFP-DHFR* from pTUB1::AMPK $\alpha$ -Ty-YFP- DHFR* fragment for pTUB1::5H-AMPK-Ty-YFP- DHFR* -3H |
| R-AMPK $\alpha$ -Ty-YFP-DHFR* | ttttgccGATTCCGTCAGCGGTCTGTC                |                                                                                                                                |
| F-3H- AMPK $\alpha$           | gctgacggaatcGGCAAAAAGAGAGTGT<br>AGAACGA    | Amplify the 3' homologous arm from gDNA of AMPK $\alpha$ for pTUB1::5H-AMPK-Ty-YFP- DHFR* -3H                                  |
| R-3H- AMPK $\alpha$           | cgactctagaggatccccggGCTATGTACGTAC<br>ACACG |                                                                                                                                |
| F-vector- AMPK $\alpha$       | CCGGGGATCCTCTAGAGTCG                       | Amplify the vector backbone from pTUB1::AMPK $\alpha$ -Ty-YFP- DHFR* for pTUB1::5H-AMPK-Ty-YFP- DHFR* -3H                      |
| R-vector- AMPK $\alpha$       | TGGTGCACTCTCAGTACAATCTGC                   |                                                                                                                                |
| F-PCR1-AMPK $\alpha$          | TTCGCCGGACAAAAGAAGAG                       | Diagnostic PCRs for the identification of RH <i>Δhxp<sub>prt</sub></i> /LoxP-AMPK $\alpha$ -Ty clones                          |
| R-PCR1-AMPK $\alpha$          | TTTGTTCGGAATTCTATAACTTCGTATA<br>A          |                                                                                                                                |
| F-PCR2-AMPK $\alpha$          | GAGGTCGTGGGCTACGTCCC                       |                                                                                                                                |
| R-PCR2-AMPK $\alpha$          | GCTGAAGCGGTGATACGGCG                       |                                                                                                                                |
| F-PCR3-AMPK $\alpha$          | GAAAACCTCTTGTGGGTCTC                       |                                                                                                                                |
| R-PCR3-AMPK $\alpha$          | TCATCTGCAAGACGATGAG                        |                                                                                                                                |

### **Supplemental references**

1. Brown KM, Long S, & Sibley LD (2017) Plasma Membrane Association by N-Acylation Governs PKG Function in *Toxoplasma gondii*. *mBio* 8(3).
2. Shen B, Brown KM, Lee TD, & Sibley LD (2014) Efficient gene disruption in diverse strains of *Toxoplasma gondii* using CRISPR/CAS9. *mBio* 5(3):e01114-01114.

**Unprocessed blots and uncropped gels for supplementary figures**

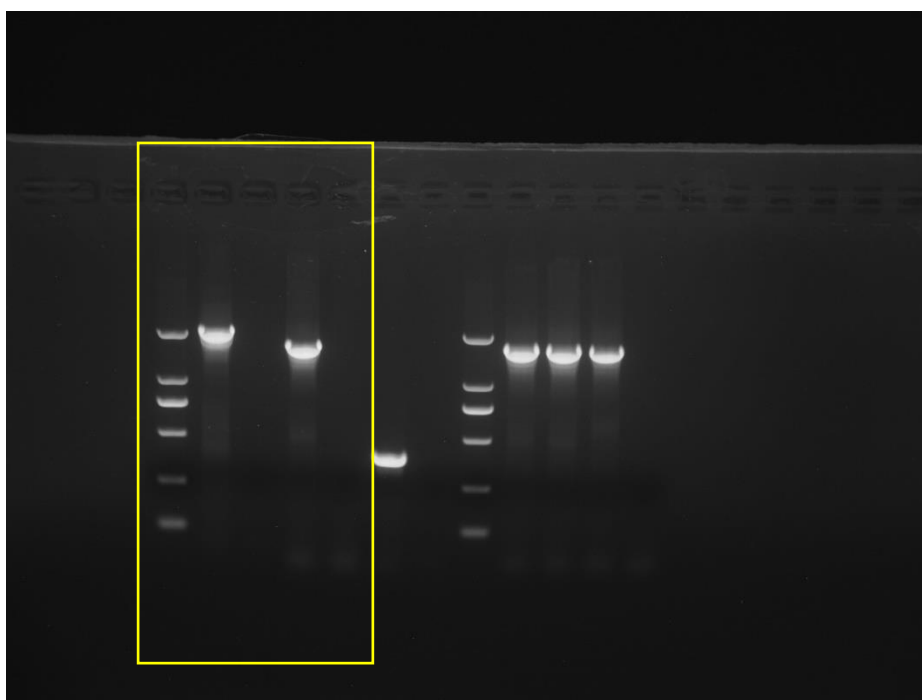

Fig S1b. PCR1/PCR2.

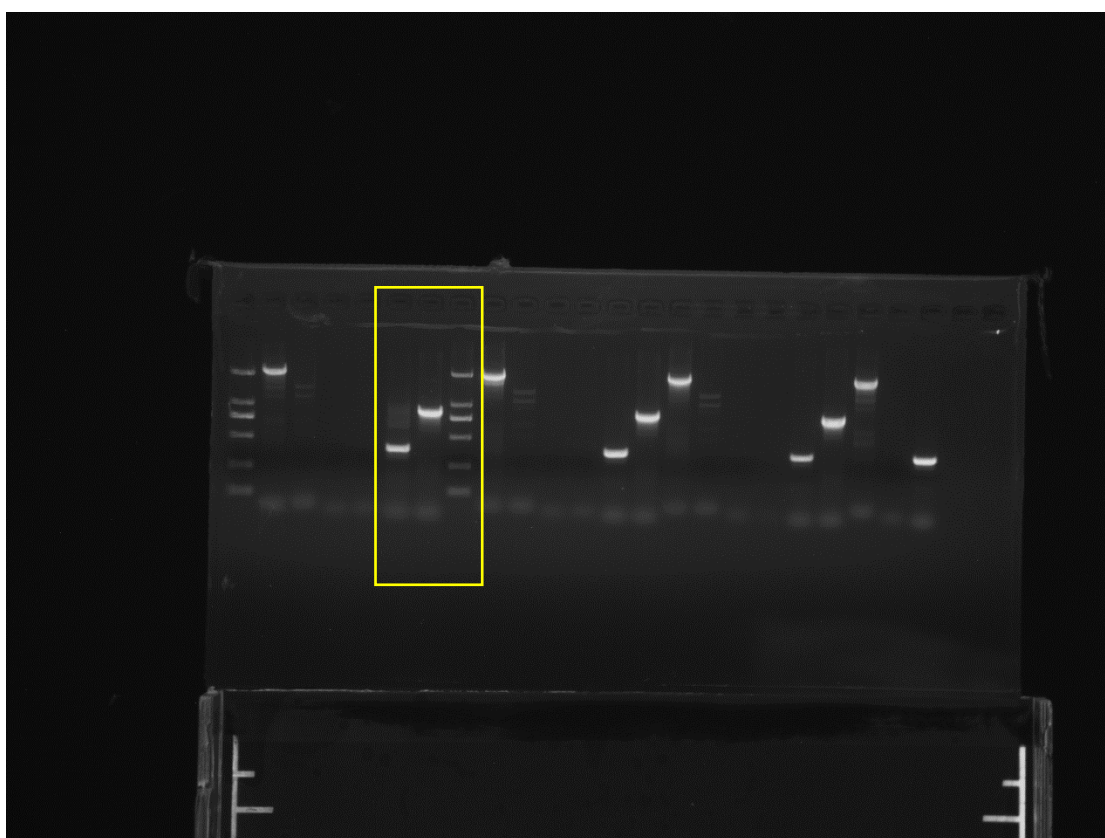

Fig S1b. PCR3.

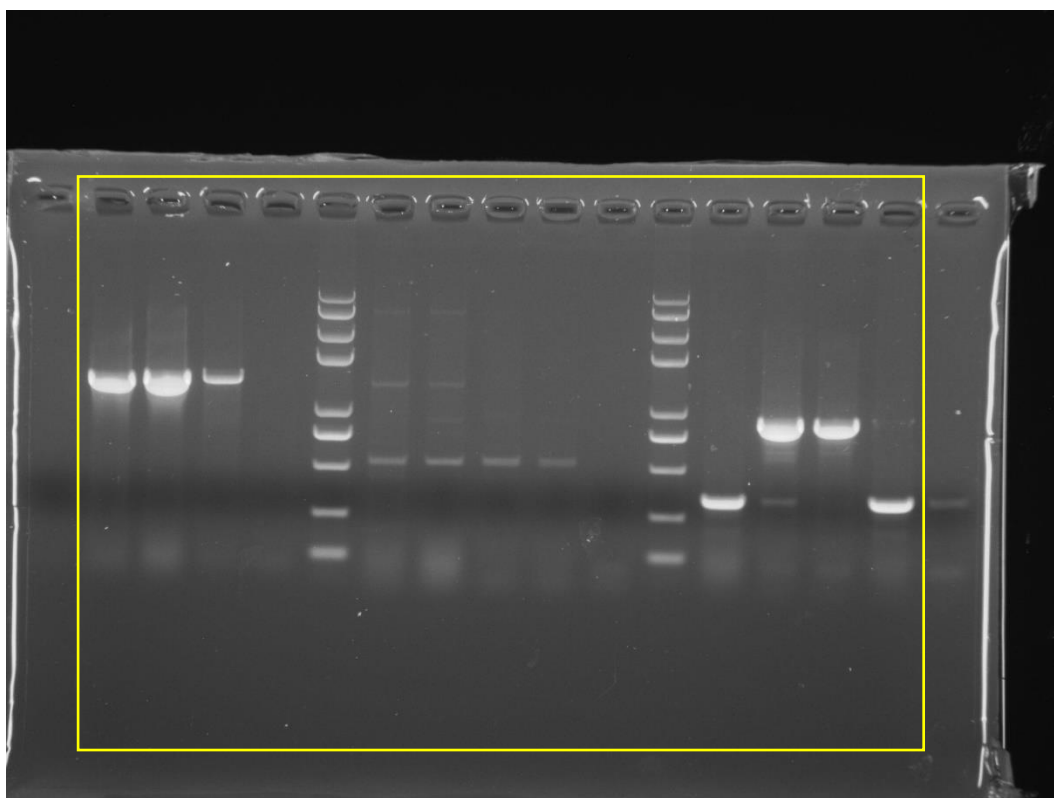

Fig S2b.

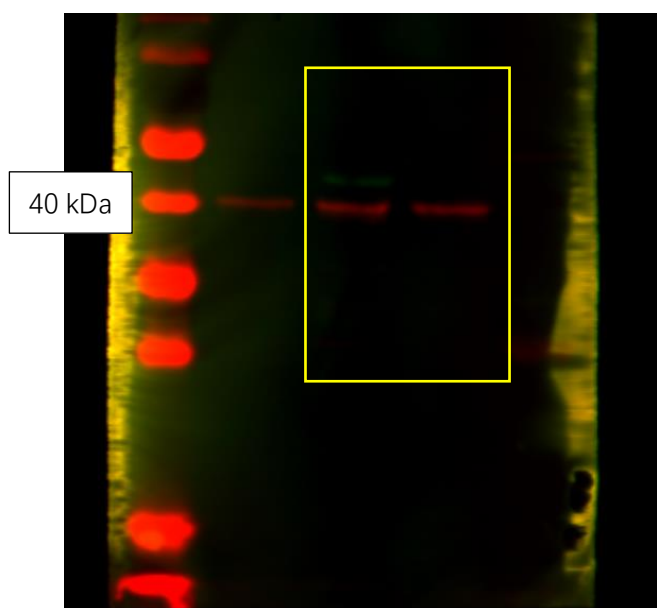

Fig S2c.

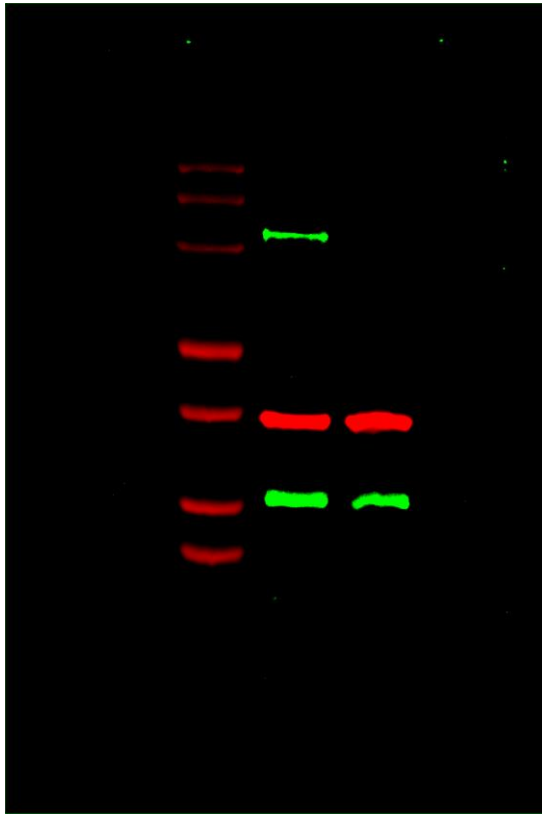

Fig S4a.

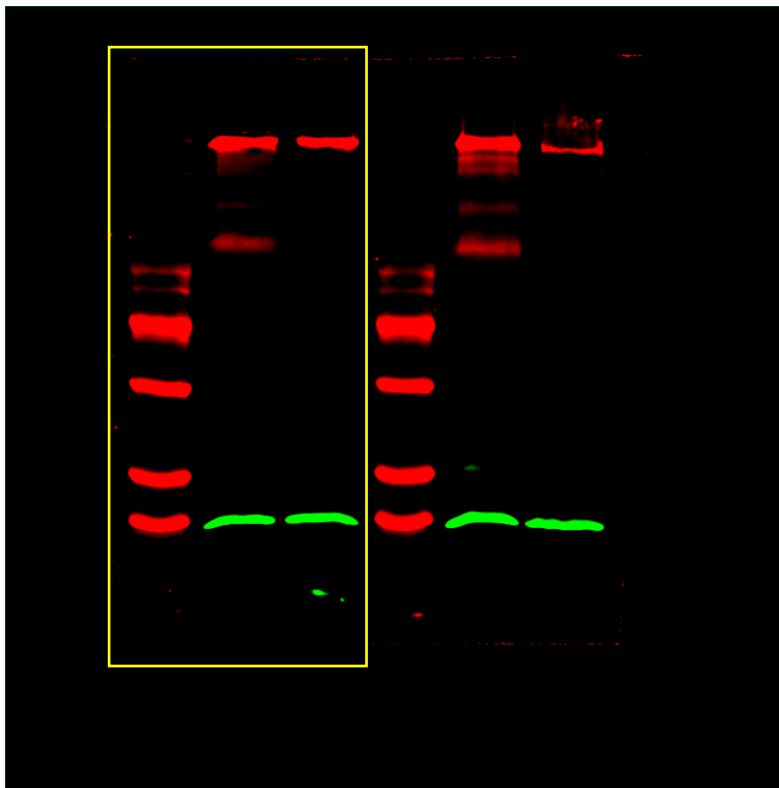

Fig S4b.

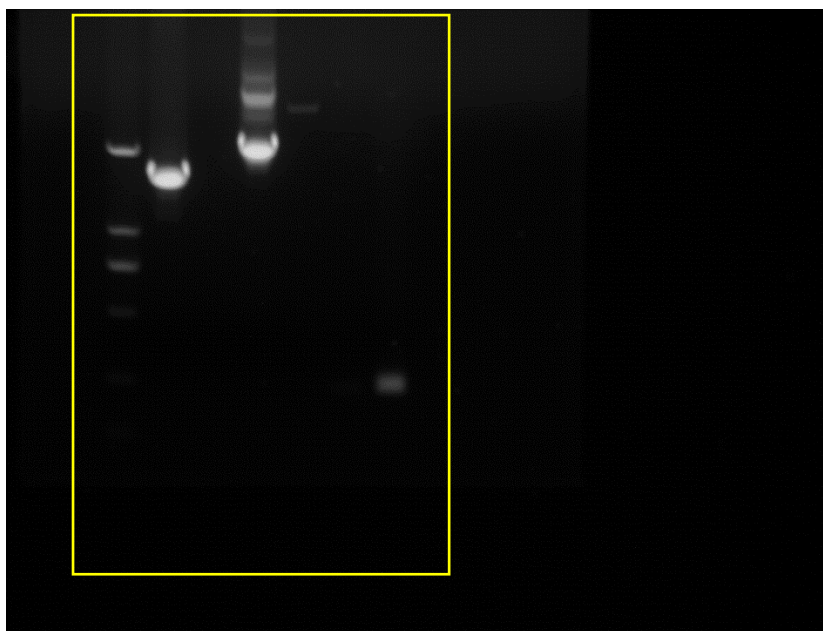

Fig S5b.

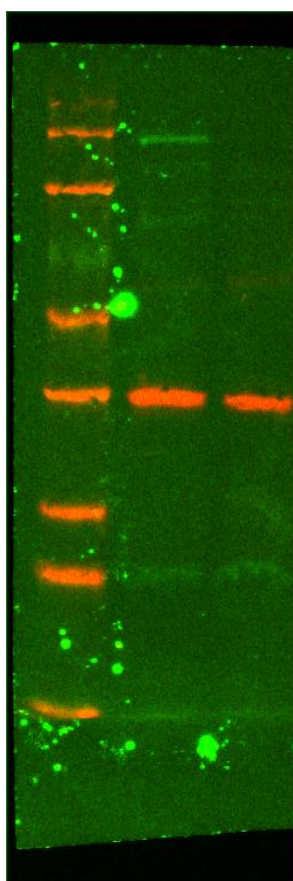

Fig S5c

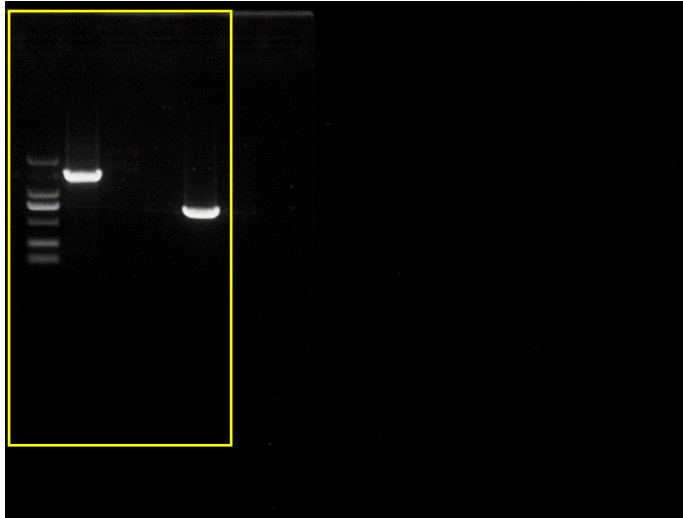

Fig S6b

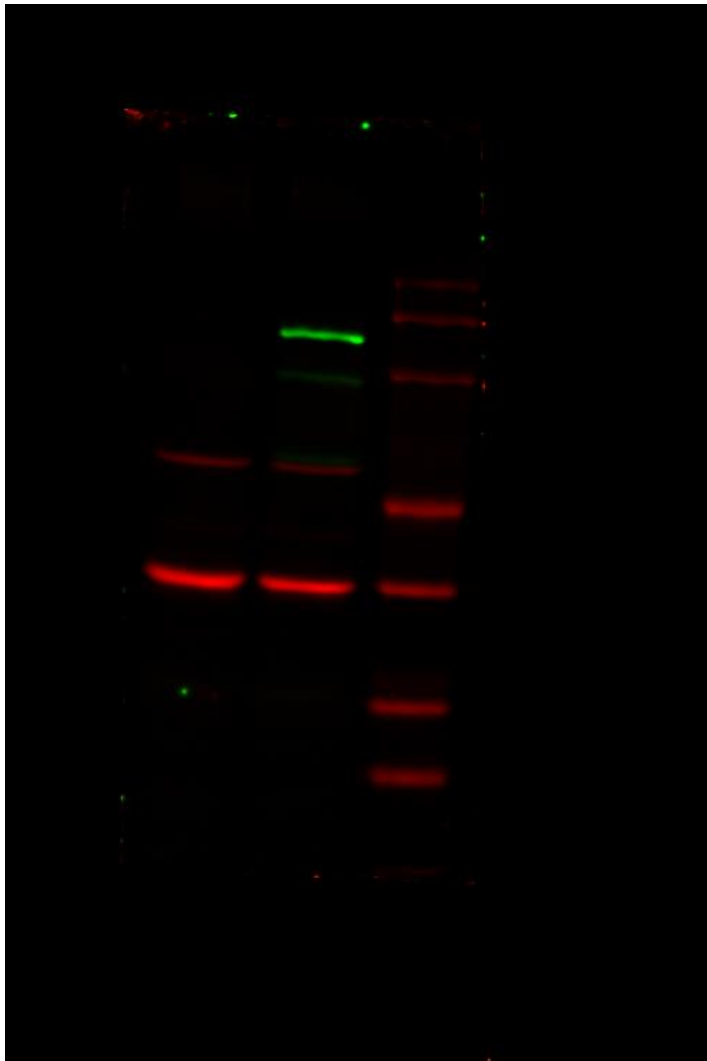

Fig S6c

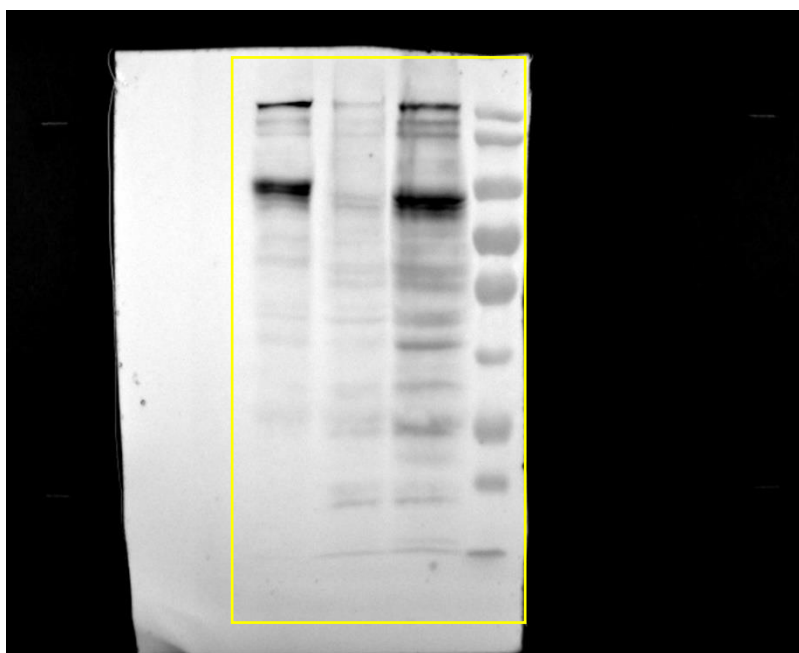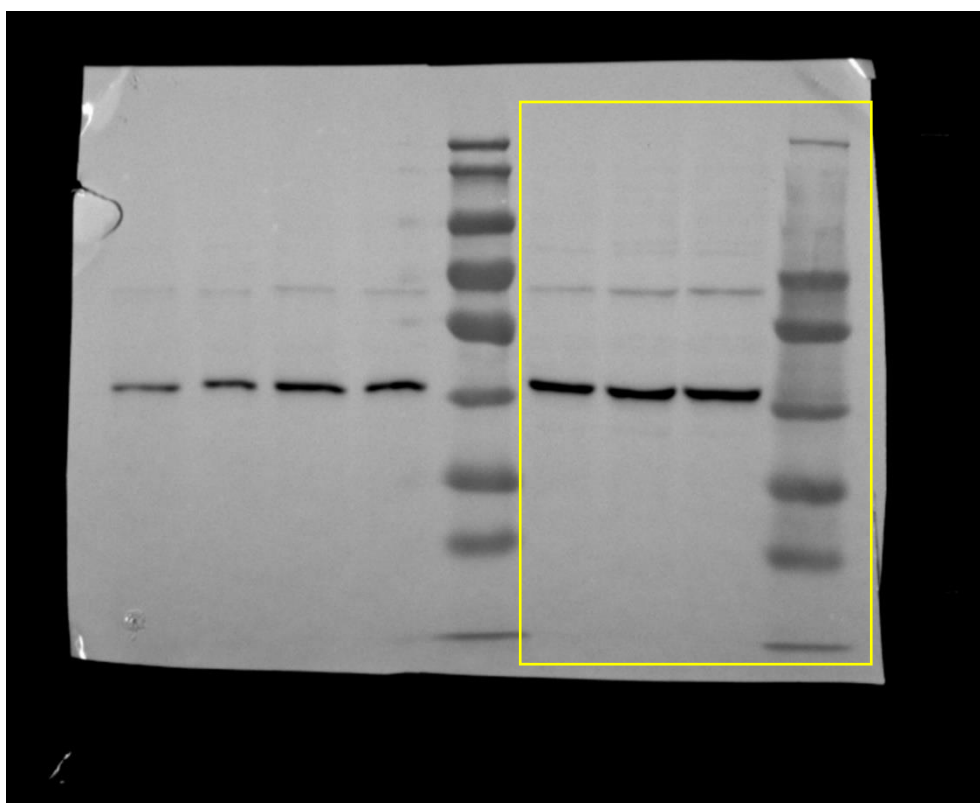

Fig S7
